# Supplementary material for: TREM2 deficiency exacerbates tau pathology through dysregulated kinase signaling in a mouse model of tauopathy
Source: Springer Nature journal article supplement (doi:10.1186/s13024-017-0216-6), 2017-10-16

**A****CX**hTauhTau;Trem2<sup>-/-</sup>**MC1**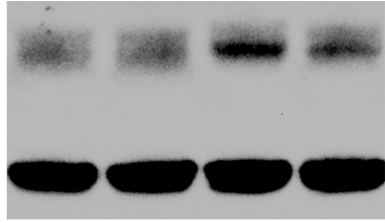

- 49kDa

- 38kDa

**GAPDH****MC1/Tau5**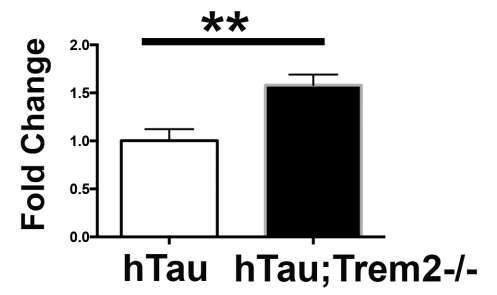**B****ratio Iba1/AT8**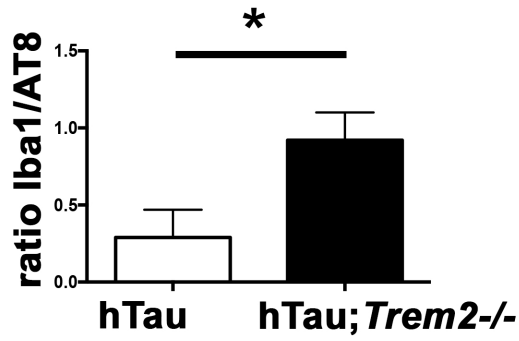

Supplement: MOESM1 [file 15138618]
