# Supplementary material for: TREM2 deficiency exacerbates tau pathology through dysregulated kinase signaling in a mouse model of tauopathy
Source: Springer Nature journal article supplement (doi:10.1186/s13024-017-0216-6), 2017-10-16

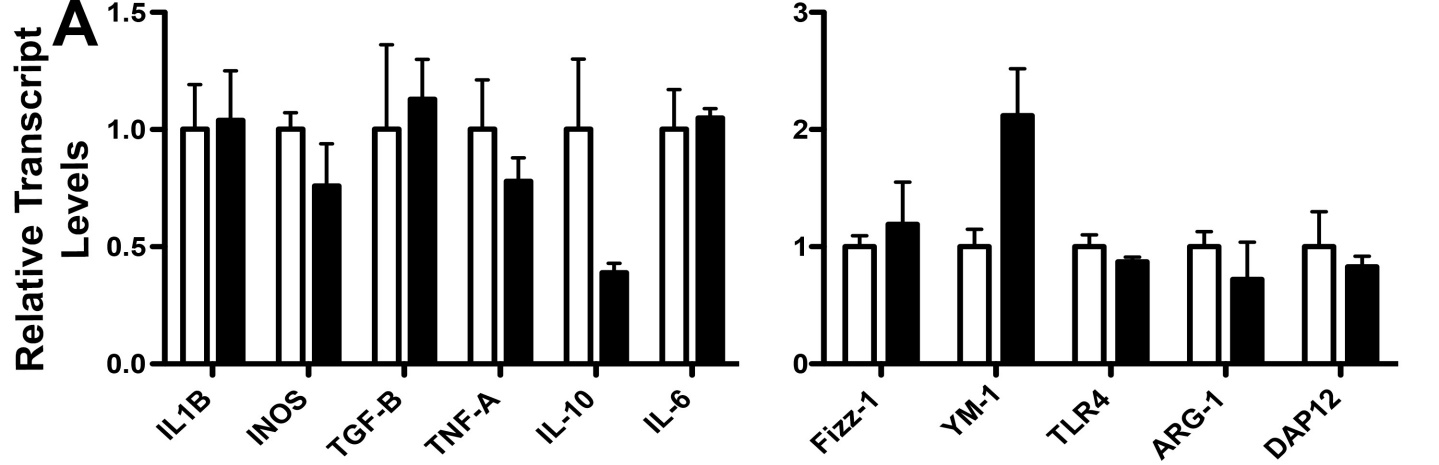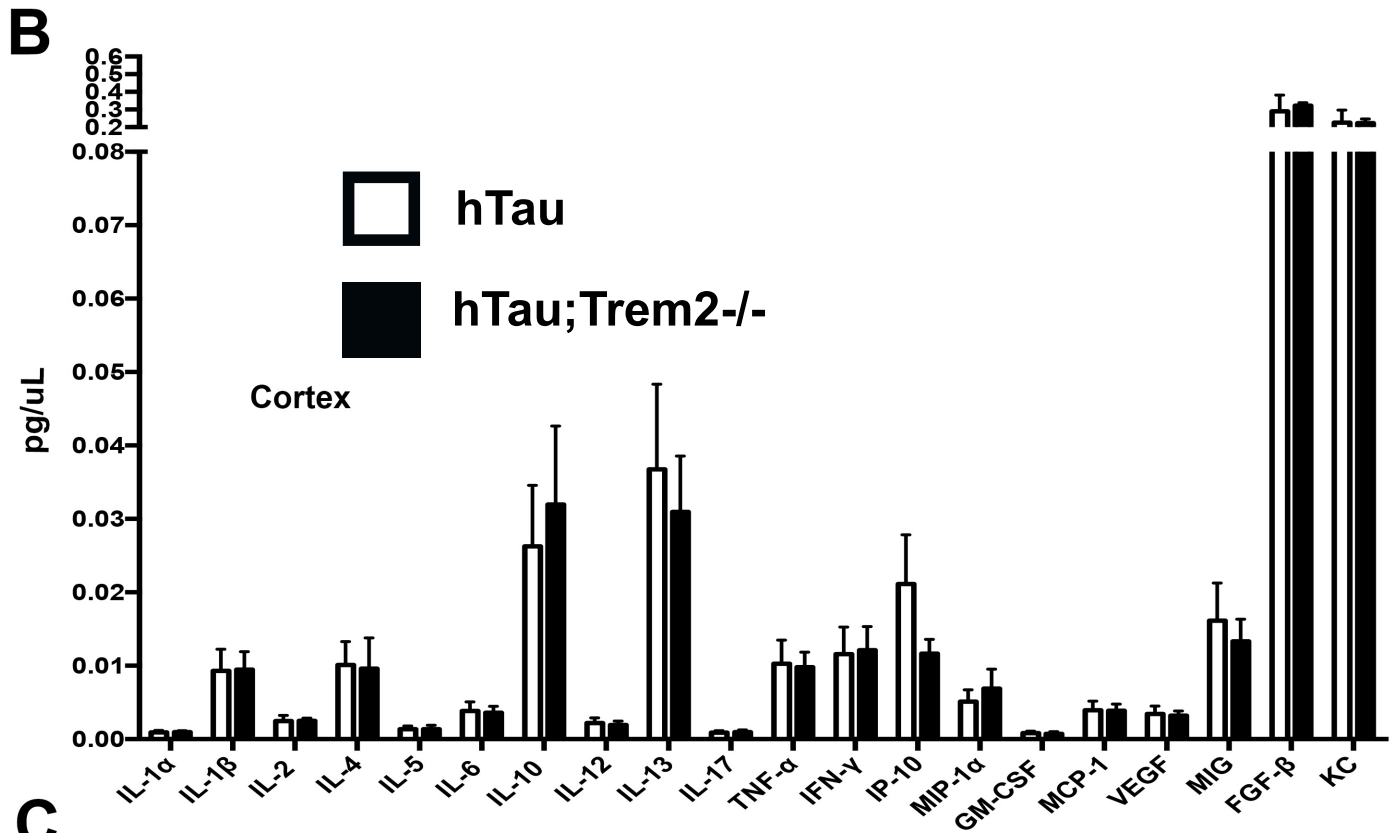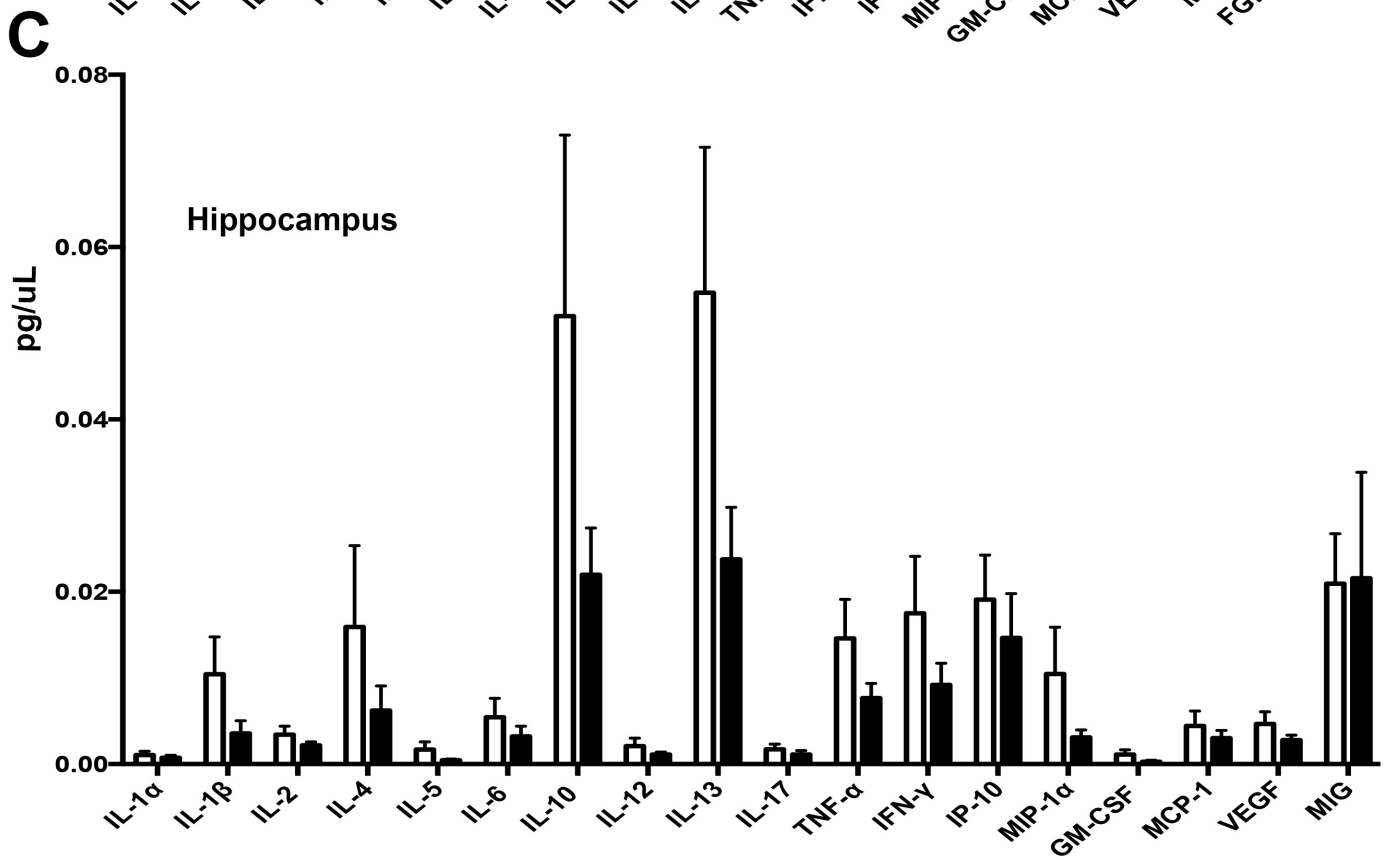

Supplement: MOESM5 [file 15138618]
